# Supplementary material
Source: publisher figshare collection journal article supplement (https://gsajournals.figshare.com/ndownloader/files/14641151)
Supplement: Supplementary file 1 [file 14641151]

## Sheet: SuppTable2-ProtTest
Gene	BIC
slc45a2	CpREV+G+F
fhl2	JTT+G
en1	JTT+G
creb1	JTT+G
nrarp	JTT+G
adam17	JTT+G
ap3b1	JTT+G
apc	JTT+G
arcn1	JTT+G
atrn	JTT+G
bloc1s1	JTT+G
bloc1s3	JTT+G
bloc1s5	JTT+G
cited1	JTT+G
corin	JTT+G
csf1	JTT+G
dctn1	JTT+G
drd2	JTT+G
eda	JTT+G
edar	JTT+G
edn3	JTT+G
ednrb	JTT+G
fzd4	JTT+G
gart	JTT+G
gata3	JTT+G
hdac1	JTT+G
impdh1	JTT+G
kcnj13	JTT+G
kif13a	JTT+G
lmx1a	JTT+G
map2k1	JTT+G
mgrn1	JTT+G
mib2	JTT+G
mitf	JTT+G
nsf	JTT+G
rab11b	JTT+G
rab17	JTT+G
rab27a	JTT+G
rab32	JTT+G
rab3ip	JTT+G
rnf41	JTT+G
snapin	JTT+G
sox18	JTT+G
sox9	JTT+G
trappc6a	JTT+G
vat1	JTT+G
vps33a	JTT+G
vps39	JTT+G
wnt1	JTT+G
snai2	JTT+G
bcl2	JTT+G
brsk2	JTT+G
ece2	JTT+G
ippk	JTT+G
mlph	JTT+G
pax3	JTT+G
ric8b	JTT+G
slc7a11	JTT+G
smtl	JTT+G
ap1g1	JTT+G
chm	JTT+G
fig4	JTT+G
gpr161	JTT+G
hps4	JTT+G
igsf11	JTT+G
med12	JTT+G
vps11	JTT+G
bloc1s4	JTT+G
crh	JTT+G
dtnbp1	JTT+G
erbb3	JTT+G
fgfr2	JTT+G
gnaq	JTT+G
mlana	JTT+G
mreg	JTT+G
ostm1	JTT+G
tfap2a	JTT+G
th	JTT+G
wnt3	JTT+G
cdh2	JTT+G
dctn2	JTT+G
usp13	JTT+G
vps18	JTT+G
kitlg	JTT+G
oca2	JTT+G
hps1	JTT+G
hps6	JTT+G
mpv17	JTT+G
csf1r	JTT+G+F
fbxw4	JTT+G+F
hps3	JTT+G+F
leo1	JTT+G+F
lyst	JTT+G+F
nf1	JTT+G+F
tpcn2	JTT+G+F
trpm7	JTT+G+F
mc1r	JTT+G+F
lef1	JTT+G+F
hps5	JTT+G+F
pcbd1	JTT+I+G
sox2	JTT+I+G
irf4	JTT+I+G
myc	JTT+I+G
ovol1	JTT+I+G
shroom2	JTT+I+G
adamts20	JTT+I+G
adrb2	JTT+I+G
bnc2	JTT+I+G
ctns	JTT+I+G
dct	JTT+I+G
ghr	JTT+I+G
ltk	JTT+I+G
mbtps1	JTT+I+G
mef2c	JTT+I+G
nrg1	JTT+I+G
pmel	JTT+I+G
pomc	JTT+I+G
scg2	JTT+I+G
trim33	JTT+I+G
tyr	JTT+I+G
zeb2	JTT+I+G
gpr143	JTT+I+G
ikbkg	JTT+I+G
ankrd27	JTT+I+G
ap3d1	JTT+I+G
frem2	JTT+I+G
gli3	JTT+I+G
oprm1	JTT+I+G+F
dock7	JTT+I+G+F
gpc3	JTT+I+G+F
mcoln3	JTT+I+G+F
mycbp2	JTT+I+G+F
myo5a	JTT+I+G+F
myo7a	JTT+I+G+F
tspan10	JTT+I+G+F
gfpt1	LG+G
slc24a5	LG+G
tmem33	LG+G
ap1m1	LG+G
bloc1s2	LG+G
bloc1s6	LG+G
gchfr	LG+G
pah	LG+G
paics	LG+G
qdpr	LG+G
sfxn1	LG+G
txndc5	LG+G
atp6v0b	LG+G
spr	LG+G
clcn7	LG+G
c12orf10	LG+G
gch2	LG+G
cd63	LG+G
sdcbp	LG+G
rabggta	LG+I+G
rab1a	LG+I+G
scarb2	LG+I+G
sf3b1	LG+I+G
skiv2l2	LG+I+G
hsd3b1	LG+I+G
pnp4	LG+I+G+F
c10orf11	VT+G
sox5	VT+G
slc24a4	VT+G+F
psen1	WAG+G
mib1	WAG+G
pts	WAG+G
recql4	WAG+G+F
itgb1	WAG+I+G
